# Supplementary material for: Chemical Constituents and Anticancer Activities of Marine-Derived Fungus Trichoderma lixii
Source: MDPI journal article supplement (doi:10.3390/molecules29092048), 2024-04-29
Supplement: s1 [file s1]

## Supplementary Materials

# Chemical constituents and anticancer activities of marine-derived fungus *Trichoderma lixii*

Natchanun Sirimangkalakitti <sup>1</sup>, Jianyu Lin <sup>1</sup>, Kazuo Harada <sup>1</sup>, Andi Setiawan <sup>2</sup>, Mitsuhiro Arisawa <sup>1,\*</sup> and Masayoshi Arai <sup>1,\*</sup>

<sup>1</sup> Graduate School of Pharmaceutical Sciences, Osaka University, 1-6 Yamadaoka, Suita, Osaka 565-0871, Japan; siriman@phs.osaka-u.ac.jp (N.S.), lin-j@phs.osaka-u.ac.jp (J.L.), harada6@phs.osaka-u.ac.jp (K.H.)

<sup>2</sup> Department of Chemistry, Faculty of Science, Lampung University, Jl. Dr. Sumantri Brodjonegoro No. 1, Bandar Lampung 35145, Indonesia; andi.setiawan@fmipa.unila.ac.id (A.S.)

\* Correspondence: arisaw@phs.osaka-u.ac.jp (Mi.A.); araim@phs.osaka-u.ac.jp (Ma.A.)

### List of supporting information

Physical and spectral data of trichodermamide A (1)

Physical and spectral data of trichodermamide B (2)

Physical and spectral data of aspergillazine A (3)

Physical and spectral data of DC1149B (4)

Physical and spectral data of ergosterol peroxide (5)

Physical and spectral data of cerebrosides D/C (6/7) and their proposed MS cleavage pathway

Physical and spectral data of 5-hydroxy-2,3-dimethyl-7-methoxychromone (8)

Physical and spectral data of nafuredin A (9)

Physical and spectral data of harzianumols E/F (10/11)

Physical and spectral data of trichodermamide A (**1**)<sup>1</sup>

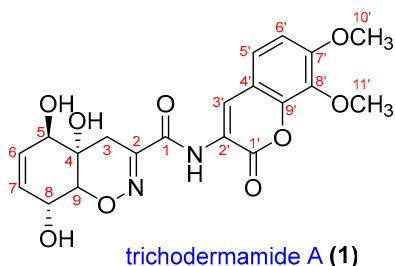

1.0 mg

Pale yellow amorphous solid

$[\alpha]_D^{26} +59^\circ$  (c 0.10, MeOH); lit.  $[\alpha]_D^{15} +128^\circ$  (c 0.15, MeOH)

UV  $\lambda_{\max}$  203, 250, 332 nm; lit. UV  $\lambda_{\max}$  250, 334 nm

HR-MALDI-MS  $m/z$  455.1064  $[M+Na]^+$ , calcd for  $C_{20}H_{20}N_2O_9Na$ , 455.1061

**Table S1.**  $^1H$  NMR (600 MHz) and  $^{13}C$  NMR (150 MHz) data for trichodermamide A (**1**) in DMSO- $d_6$

| position              | $\delta_H$ (Multiplicity)                                  | $\delta_C$ (Type)       |
|-----------------------|------------------------------------------------------------|-------------------------|
| NH                    | 9.34 (1H, s)                                               |                         |
| 1                     |                                                            | 161.0 (C)               |
| 2                     |                                                            | 150.2 (C)               |
| 3                     | 2.48 (1H, d, $J = 20.1$ Hz)<br>2.04 (1H, d, $J = 20.1$ Hz) | 23.1 (CH <sub>2</sub> ) |
| 4                     |                                                            | 67.4 (C)                |
| 5                     | 4.23 (1H, d, $J = 3.0$ Hz)                                 | 73.2 (CH)               |
| 6                     | 5.45 (1H, d, $J = 10.5$ Hz)                                | 129.9 (CH)              |
| 7                     | 5.40 (1H, d, $J = 10.5$ Hz)                                | 128.1 (CH)              |
| 8                     | 4.00 (2H, s)                                               | 66.2 (CH)               |
| 9                     |                                                            | 83.9 (CH)               |
| 4-OH                  | 5.28 (1H, s)                                               |                         |
| 5-OH                  | 5.32 (1H, d, $J = 5.4$ Hz)                                 |                         |
| 8-OH                  | 5.45 (1H, s)                                               |                         |
| 1'                    |                                                            | 157.9 (C)               |
| 2'                    |                                                            | 121.0 (C)               |
| 3'                    | 8.55 (1H, s)                                               | 123.7 (CH)              |
| 4'                    |                                                            | 113.7 (C)               |
| 5'                    | 7.52 (1H, d, $J = 8.7$ Hz)                                 | 123.1 (CH)              |
| 6'                    | 7.15 (1H, d, $J = 8.7$ Hz)                                 | 110.1 (CH)              |
| 7'                    |                                                            | 153.8 (C)               |
| 8'                    |                                                            | 135.2 (C)               |
| 9'                    |                                                            | 143.6 (C)               |
| OCH <sub>3</sub> -10' | 3.90 (3H, s)                                               | 56.4 (CH <sub>3</sub> ) |
| OCH <sub>3</sub> -11' | 3.84 (3H, s)                                               | 60.9 (CH <sub>3</sub> ) |

<sup>1</sup> Garo, E.; Starks, C.M.; Jensen, P.R.; Fenical, W.; Lobkovsky, E.; Clardy, J. Trichodermamides A and B, Cytotoxic Modified Dipeptides from the Marine-Derived Fungus *Trichoderma virens*. *J Nat Prod* **2003**, 66, 423-426.

Physical and spectral data of trichodermamide B (**2**)<sup>1</sup>

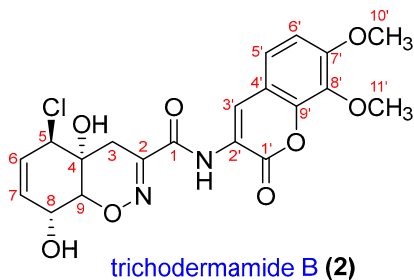

3.0 mg

Colorless amorphous powder

$[\alpha]_D^{26} +103^\circ$  (c 0.16, MeOH); lit.  $[\alpha]_D^{15} +111^\circ$  (c 0.15, MeOH)

UV  $\lambda_{\max}$  203, 252, 345 nm; lit. UV  $\lambda_{\max}$  252, 344 nm

HR-MALDI-MS  $m/z$  473.0722  $[M+Na]^+$ , calcd for  $C_{20}H_{19}N_2O_8Na^{35}Cl$ , 473.0722

**Table S2.**  $^1H$  NMR (600 MHz) and  $^{13}C$  NMR (150 MHz) data for trichodermamide B (**2**) in  $CDCl_3$ +DMSO- $d_6$

| position              | $\delta_H$ (Multiplicity)                                        | $\delta_C$ (Type)       |
|-----------------------|------------------------------------------------------------------|-------------------------|
| NH                    | 9.35 (1H, s)                                                     |                         |
| 1                     |                                                                  | 160.9 (C)               |
| 2                     |                                                                  | 149.8 (C)               |
| 3                     | 2.75 (1H, dd, $J = 19.2, 1.8$ Hz)<br>2.15 (1H, d, $J = 19.2$ Hz) | 25.2 (CH <sub>2</sub> ) |
| 4                     |                                                                  | 67.5 (C)                |
| 5                     | 4.77 (1H, br s)                                                  | 64.9 (CH)               |
| 6                     | 5.52 (2H, m)                                                     | 129.3 (CH)              |
| 7                     |                                                                  | 127.5 (CH)              |
| 8                     | 4.03 (1H, m)                                                     | 65.8 (CH)               |
| 9                     | 4.19 (1H, dd, $J = 7.8, 1.8$ Hz)                                 | 84.1 (CH)               |
| 4-OH                  | 5.42 (1H, s)                                                     |                         |
| 8-OH                  | 5.29 (1H, d, $J = 5.4$ Hz)                                       |                         |
| 1'                    |                                                                  | 158.0 (C)               |
| 2'                    |                                                                  | 120.9 (C)               |
| 3'                    | 8.50 (1H, s)                                                     | 124.1 (CH)              |
| 4'                    |                                                                  | 113.9 (C)               |
| 5'                    | 7.11 (1H, d, $J = 8.7$ Hz)                                       | 122.5 (CH)              |
| 6'                    | 6.82 (1H, d, $J = 8.7$ Hz)                                       | 109.3 (CH)              |
| 7'                    |                                                                  | 154.0 (C)               |
| 8'                    |                                                                  | 135.8 (C)               |
| 9'                    |                                                                  | 143.9 (C)               |
| OCH <sub>3</sub> -10' | 3.85 (3H, s)                                                     | 61.3 (CH <sub>3</sub> ) |
| OCH <sub>3</sub> -11' | 3.83 (3H, s)                                                     | 56.3 (CH <sub>3</sub> ) |

Physical and spectral data of aspergillazine A (**3**)<sup>2,3</sup>

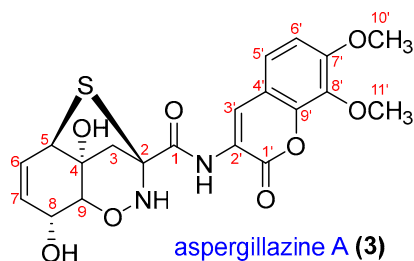

9.6 mg

Pale yellow powder

$[\alpha]_D^{26} -273^\circ$  (c 0.08, MeOH); lit.  $[\alpha]_D^{20} -356^\circ$  (c 0.14, MeOH)<sup>3</sup>

UV  $\lambda_{\max}$  205, 244, 337 nm; lit. UV  $\lambda_{\max}$  205, 245, 337 nm<sup>2</sup>

HR-MALDI-MS  $m/z$  471.0834  $[M+Na]^+$ , calcd for  $C_{20}H_{20}N_2O_8NaS$ , 471.0833

**Table S3.**  $^1H$  NMR (600 MHz) and  $^{13}C$  NMR (150 MHz) data for aspergillazine A (**3**) in  $CD_3OD$ <sup>2</sup>

| position              | $\delta_H$ (Multiplicity)                                  | $\delta_C$ (Type)       |
|-----------------------|------------------------------------------------------------|-------------------------|
| 1                     |                                                            | 162.1 (C)               |
| 2                     |                                                            | 77.2 (C)                |
| 3                     | 3.12 (1H, d, $J = 11.7$ Hz)<br>2.39 (1H, d, $J = 11.7$ Hz) | 50.8 (CH <sub>2</sub> ) |
| 4                     |                                                            | 76.1 (C)                |
| 5                     | 4.14 (1H, d, $J = 5.0$ Hz)                                 | 47.7 (CH)               |
| 6                     | 5.93 (1H, dd, $J = 9.9, 5.0$ Hz)                           | 126.1 (CH)              |
| 7                     | 6.06 (1H, dd, $J = 9.9, 5.1$ Hz)                           | 128.4 (CH)              |
| 8                     | 4.34 (1H, br d, $J = 3.6$ Hz)                              | 65.2 (CH)               |
| 9                     | 4.20 (1H, br s)                                            | 81.8 (CH)               |
| 1'                    |                                                            | 158.0 (C)               |
| 2'                    |                                                            | 121.2 (C)               |
| 3'                    | 6.97 (1H, s)                                               | 118.4 (CH)              |
| 4'                    |                                                            | 115.3 (C)               |
| 5'                    | 7.04 (1H, d, $J = 8.4$ Hz)                                 | 129.4 (CH)              |
| 6'                    | 6.64 (1H, d, $J = 8.4$ Hz)                                 | 105.8 (CH)              |
| 7'                    |                                                            | 155.9 (C)               |
| 8'                    |                                                            | 137.9 (C)               |
| 9'                    |                                                            | 148.9 (C)               |
| OCH <sub>3</sub> -10' | 3.88 (3H, s)                                               | 56.4 (CH <sub>3</sub> ) |
| OCH <sub>3</sub> -11' | 3.81 (3H, s)                                               | 61.2 (CH <sub>3</sub> ) |

<sup>2</sup> Capon, R.J.; Ratnayake, R.; Stewart, M.; Lacey, E.; Tennant, S.; Gill, J.H. Aspergillazines A-E: novel heterocyclic dipeptides from an Australian strain of *Aspergillus unilateralis*. *Org Biomol Chem* **2005**, 3, 123-129.

<sup>3</sup> Yamazaki, H.; Rotinsulu, H.; Takahashi, O.; Kirikoshi, R.; Namikoshi, M. Induced production of a new dipeptide with a disulfide bridge by long-term fermentation of marine-derived *Trichoderma cf. brevicompactum*. *Tetrahedron Lett* **2016**, 57, 5764-5767.

Physical and spectral data of DC1149B (**4**)<sup>4</sup>

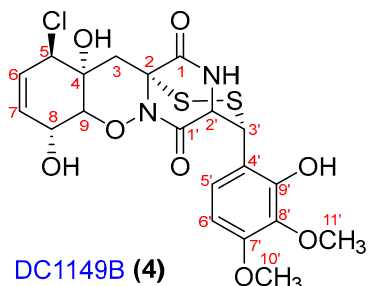

11.0 mg

Pale yellow powder

$[\alpha]_D^{25}$  -206° (c 0.04, MeOH); lit.  $[\alpha]_D^{20}$  -288° (c 0.10, MeOH)

UV  $\lambda_{\max}$  204, 280, 342 nm; lit. UV  $\lambda_{\max}$  207, 280 nm

HR-MALDI-MS  $m/z$  539.0319  $[M+Na]^+$ , calcd for  $C_{20}H_{21}N_2O_8NaS_2^{35}Cl$ , 509.0320

**Table S4.**  $^1H$  NMR (600 MHz) and  $^{13}C$  NMR (150 MHz) data for DC1149B (**4**) in DMSO- $d_6$

| position              | $\delta_H$ (Multiplicity)                                  | $\delta_C$ (Type)       |
|-----------------------|------------------------------------------------------------|-------------------------|
| NH                    | 9.06 (1H, br s)                                            |                         |
| 1                     |                                                            | 166.5 (C)               |
| 2                     |                                                            | 69.9 (C)                |
| 3                     | 2.13 (1H, d, $J$ = 15.3 Hz)<br>2.00 (1H, d, $J$ = 15.3 Hz) | 33.0 (CH <sub>2</sub> ) |
| 4                     |                                                            | 69.9 (C)                |
| 5                     | 4.81 (1H, s)                                               | 67.0 (CH)               |
| 6                     | 5.52 (1H, d, $J$ = 10.2 Hz)                                | 126.4 (CH)              |
| 7                     | 5.58 (1H, d, $J$ = 10.2 Hz)                                | 131.1 (CH)              |
| 8                     | 4.30 (1H, br s)                                            | 64.0 (CH)               |
| 9                     | 4.00 (1H, d, $J$ = 6.6 Hz)                                 | 85.4 (CH)               |
| 4-OH                  | 5.62 (1H, br s)                                            |                         |
| 8-OH                  | 5.36 (1H, br s)                                            |                         |
| 1'                    |                                                            | 164.3 (C)               |
| 2'                    | 4.39 (1H, br s)                                            | 58.7 (CH)               |
| 3'                    | 4.45 (1H, s)                                               | 44.8 (CH)               |
| 4'                    |                                                            | 116.2 (C)               |
| 5'                    | 7.37 (1H, d, $J$ = 9.0 Hz)                                 | 122.8 (CH)              |
| 6'                    | 6.49 (1H, d, $J$ = 9.0 Hz)                                 | 103.2 (CH)              |
| 7'                    |                                                            | 152.8 (C)               |
| 8'                    |                                                            | 135.7 (C)               |
| 9'                    |                                                            | 147.7 (C)               |
| 9'-OH                 | 9.38 (1H, s)                                               |                         |
| OCH <sub>3</sub> -10' | 3.73 (3H, s)                                               | 55.6 (CH <sub>3</sub> ) |
| OCH <sub>3</sub> -11' | 3.62 (3H, s)                                               | 60.1 (CH <sub>3</sub> ) |

<sup>4</sup> Yamazaki, H.; Takahashi, O.; Murakami, K.; Namikoshi, M. Induced production of a new unprecedented epitritiodiketopiperazine, chlorotritiodibrevamide, by a culture of the marine-derived *Trichoderma* cf. *brevicompectum* with dimethyl sulfoxide. *Tetrahedron Lett* **2015**, 56, 6262-6265.

Physical and spectral data of ergosterol peroxide (**5**)<sup>5,6</sup>

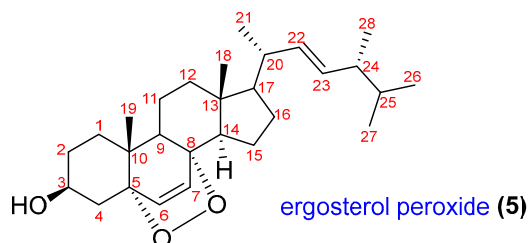

0.9 mg

Colorless solid

$[\alpha]_D^{22}$   $-18^\circ$  (c 0.08,  $\text{CHCl}_3$ ); lit.  $[\alpha]_D^{25}$   $-26^\circ$  (c 0.2,  $\text{CHCl}_3$ )<sup>6</sup>

HR-MALDI-MS  $m/z$  451.3183  $[\text{M}+\text{Na}]^+$ , calcd for  $\text{C}_{28}\text{H}_{44}\text{O}_3\text{Na}$ , 451.3188

**Table S5.**  $^1\text{H}$  NMR (600 MHz) and  $^{13}\text{C}$  NMR (150 MHz) data for ergosterol peroxide (**5**) in  $\text{CDCl}_3$ <sup>5,6</sup>

| position | $\delta_{\text{H}}$ (Multiplicity)                                     | $\delta_{\text{C}}$ (Type)                       |
|----------|------------------------------------------------------------------------|--------------------------------------------------|
| 1        | 1.95 (1H, m)<br>1.69 (1H, dt, $J = 13.8, 3.6$ Hz)                      | 34.8 ( $\text{CH}_2$ )                           |
| 2        | 1.85 (1H, m)<br>1.56 (1H, m)                                           | 30.2 ( $\text{CH}_2$ )                           |
| 3        | 3.97 (1H, m)                                                           | 66.6 (CH)                                        |
| 4        | 2.12 (1H, ddd, $J = 13.7, 4.8, 1.5$ Hz)<br>1.93 (1H, d, $J = 13.7$ Hz) | 37.0 ( $\text{CH}_2$ )                           |
| 5        |                                                                        | 82.3 (C)                                         |
| 6        | 6.25 (1H, d, $J = 8.4$ Hz)                                             | 135.5 (CH)                                       |
| 7        | 6.51 (1H, d, $J = 8.4$ Hz)                                             | 130.9 (CH)                                       |
| 8        |                                                                        | 79.6 (C)                                         |
| 9        | 1.50 (1H, m)                                                           | 51.2 (CH)                                        |
| 10       |                                                                        | 37.1 (C)                                         |
| 11       | 1.51 (2H, m)                                                           | 23.5 ( $\text{CH}_2$ )                           |
| 12       | 1.95 (1H, m)<br>1.23 (1H, m)                                           | 39.4 ( $\text{CH}_2$ )                           |
| 13       |                                                                        | 44.7 (C)                                         |
| 14       | 1.58 (1H, m)                                                           | 51.8 (CH)                                        |
| 15       | 1.61 (2H, m)                                                           | 20.8 ( $\text{CH}_2$ )                           |
| 16       | 1.75 (1H, m)<br>1.35 (1H, m)                                           | 28.8 ( $\text{CH}_2$ )                           |
| 17       | 1.22 (1H, m)                                                           | 56.3 (CH)                                        |
| 18       | 0.81 (3H, s)                                                           | 13.0 ( $\text{CH}_3$ )                           |
| 19       | 0.88 (3H, s)                                                           | 18.3 ( $\text{CH}_3$ )                           |
| 20       | 2.01 (1H, m)                                                           | 39.9 (CH)                                        |
| 21       | 1.00 (3H, d, $J = 6.6$ Hz)                                             | 21.0 ( $\text{CH}_3$ )                           |
| 22       | 5.14 (1H, dd, $J = 15.2, 8.7$ Hz)                                      | 135.3 (CH)                                       |
| 23       | 5.22 (1H, dd, $J = 15.2, 7.8$ Hz)                                      | 132.4 (CH)                                       |
| 24       | 1.85 (1H, m)                                                           | 42.9 (CH)                                        |
| 25       | 1.46 (1H, m)                                                           | 33.2 (CH)                                        |
| 26, 27   | 0.81 (3H, d, $J = 6.6$ Hz)<br>0.83 (3H, d, $J = 6.6$ Hz)               | 19.8 ( $\text{CH}_3$ )<br>20.1 ( $\text{CH}_3$ ) |
| 28       | 0.90 (3H, d, $J = 6.6$ Hz)                                             | 17.7 ( $\text{CH}_3$ )                           |

<sup>5</sup> Kim, D.S.; Baek, N.I.; Oh, S.R.; Jung, K.Y.; Lee, I.S.; Kim, J.H.; Lee, H.K. Anticomplementary activity of ergosterol peroxide from *Naematoloma fasciculare* and reassignment of NMR data. *Arch Pharm Res* **1997**, 20, 201-205.

<sup>6</sup> Lee, I.S.; Kim, J.P.; Na, M.K.; Jung, H.J.; Min, B.S.; Bae, K.H. Cytotoxicity of ergosterol derivatives from the fruiting bodies of *Hygrophorus russula*. *Nat Prod Sci* **2011**, 17, 85-89.

Physical and spectral data of cerebrosides D/C (6/7)<sup>7</sup>

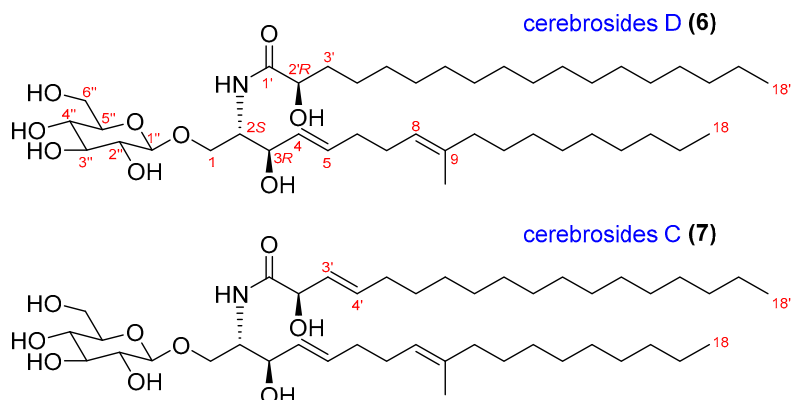

1.3 mg, mixture of cerebrosides 6 (major) and 7 (minor)

Colorless solid

$[\alpha]_D^{18}$   $-2^\circ$  (c 0.07, MeOH); lit. 6  $[\alpha]_D^{25}$   $+8^\circ$  (c 0.25, MeOH); 7  $[\alpha]_D^{23}$   $-9^\circ$  (c 0.23, MeOH)

UV  $\lambda_{\max}$  203 nm

HR-MALDI-MS  $m/z$  778.5797  $[M+Na]^+$ , calcd for  $C_{43}H_{81}NO_9Na$ , 778.5809 (6);  $m/z$  776.5641  $[M+Na]^+$ , calcd for  $C_{43}H_{79}NO_9Na$ , 776.5653 (7)

The length of the sphingoid long-chain base (LCB, C1-C18) and amide-linked long-chain fatty acid base (C1'-C18') were suggested as 18 carbons based on positive LC-MS/MS fragment ions<sup>10</sup>

6  $m/z$  756.7  $[M+H]^+$ , 738.3  $[M+H-H_2O]^+$ , 576.2  $[M+H-Glu]^+$ , 558.5  $[M+H-Glu-H_2O]^+$ , 396.6  $[M+H-Glu-LCB]^+$ , 378.2  $[M+H-Glu-LCB-H_2O]^+$

7  $m/z$  754.7  $[M+H]^+$ , 736.3  $[M+H-H_2O]^+$ , 574.3  $[M+H-Glu]^+$ , 556.6  $[M+H-Glu-H_2O]^+$ , 394.6  $[M+H-Glu-LCB]^+$ , 376.4  $[M+H-Glu-LCB-H_2O]^+$

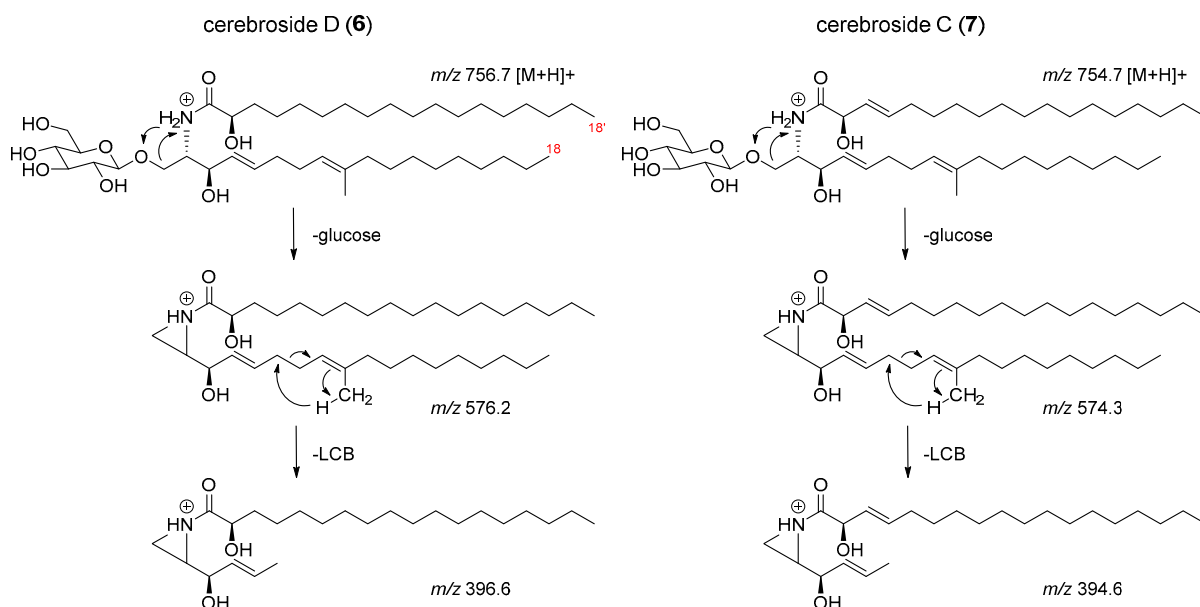

Figure S1. Proposed MS cleavage pathway of cerebrosides D (6) and C (7)

<sup>7</sup> Jiang, T.; Li, T.; Li, J.; Fu, H.Z.; Pei, Y.H.; Lin, W.H. Cerebroside analogues from marine-derived fungus *Aspergillus flavipes*. *J Asian Nat Prod Res* **2004**, 6, 249-257.

**Table S6.** <sup>1</sup>H NMR (600 MHz) and <sup>13</sup>C NMR (150 MHz) data for cerebrosides D/C (6/7)

| position          | 6 in DMSO- <i>d</i> <sub>6</sub> <sup>7</sup> |                              | 6 in CD <sub>3</sub> OD                                                          |                              | 7 in CD <sub>3</sub> OD                                                          |                              |
|-------------------|-----------------------------------------------|------------------------------|----------------------------------------------------------------------------------|------------------------------|----------------------------------------------------------------------------------|------------------------------|
|                   | δ <sub>H</sub> (Multiplicity)                 | δ <sub>C</sub> (Type)        | δ <sub>H</sub> (Multiplicity)                                                    | δ <sub>C</sub> (Type)        | δ <sub>H</sub> (Multiplicity)                                                    | δ <sub>C</sub> (Type)        |
| 1                 | 3.93 (1H, m)<br>3.50 (1H, m)                  | 68.8 (CH <sub>2</sub> )      | 4.12 (1H, m)<br>3.71 (1H, dd, <i>J</i> = 10.5, 3.3 Hz)                           | 69.74 (CH <sub>2</sub> )     | 4.12 (1H, m)<br>3.71 (1H, dd, <i>J</i> = 10.5, 3.3 Hz)                           | 69.65 (CH <sub>2</sub> )     |
| 2                 | 3.80 (1H, m)                                  | 52.9 (CH)                    | 3.985 (1H, m)                                                                    | 54.58 (CH)                   | 3.985 (1H, m)                                                                    | 54.61 (CH)                   |
| 3                 | 3.98 (1H, m),                                 | 70.5 (CH)                    | 4.14 (1H, m)                                                                     | 72.9 (CH)                    | 4.14 (1H, m)                                                                     | 72.9 (CH)                    |
| 4                 | 5.40 (1H, dd, <i>J</i> = 15.0, 6.6 Hz)        | 131.09 (CH)                  | 5.48 (1H, dd, <i>J</i> = 15.0, 7.2 Hz)                                           | 131.1 (CH)                   | 5.49 (1H, m)                                                                     | 131.1 (CH)                   |
| 5                 | 5.54 (1H, m)                                  | 131.07 (CH)                  | 5.74 (1H, dt, <i>J</i> = 15.0, 6.0 Hz)                                           | 134.67 (CH)                  | 5.72 (1H, m)                                                                     | 134.5 (CH)/<br>134.74 (CH)   |
| 6                 | 1.94 (2H, m)                                  | 32.2 (CH <sub>2</sub> )      | 2.05 (2H, m)                                                                     | 33.8 (CH <sub>2</sub> )      | 2.05 (2H, m)                                                                     | 33.8 (CH <sub>2</sub> )      |
| 7                 | 1.97 (2H, m)                                  | 27.4 (CH <sub>2</sub> )      | 2.07 (2H, m)                                                                     | 28.7 (CH <sub>2</sub> )      | 2.07 (2H, m)                                                                     | 28.8 (CH <sub>2</sub> )      |
| 8                 | 5.09 (1H, t, <i>J</i> = 6.0 Hz)               | 123.5 (CH)                   | 5.15 (1H, td, <i>J</i> = 6.8, 0.9 Hz)                                            | 124.8 (CH)                   | 5.15 (1H, td, <i>J</i> = 6.8, 0.9 Hz)                                            | 124.9 (CH)                   |
| 9                 |                                               | 135.0 (C)                    |                                                                                  | 136.8 (C)                    |                                                                                  | 136.7 (C)                    |
| 10                | 1.91 (2H, t, <i>J</i> = 7.5 Hz)               | 39.5 (CH <sub>2</sub> )      | 1.98 (2H, t, <i>J</i> = 7.5 Hz)                                                  | 40.8 (CH <sub>2</sub> )      | 1.98 (2H, t, <i>J</i> = 7.5 Hz)                                                  | 40.8 (CH <sub>2</sub> )      |
| 11                | 1.23 (br s)                                   | 28.7-32.2 (CH <sub>2</sub> ) | 1.29 (br s)                                                                      | 29.12 (CH <sub>2</sub> )     | 1.29 (br s)<br>1.39 (m)                                                          | 29.14 (CH <sub>2</sub> )     |
| 12-15             |                                               |                              | 1.39 (m)                                                                         | 30.2-30.9 (CH <sub>2</sub> ) |                                                                                  | 30.2-30.9 (CH <sub>2</sub> ) |
| 16                |                                               |                              | 1.41 (m)                                                                         | 33.1 (CH <sub>2</sub> )      |                                                                                  | 33.1 (CH <sub>2</sub> )      |
| 17                | 1.25 (overlapped)                             | 22.2 (CH <sub>2</sub> )      | 1.31 (overlapped)                                                                | 23.8 (CH <sub>2</sub> )      | 1.31 (overlapped)                                                                | 23.8 (CH <sub>2</sub> )      |
| 18                | 0.85 (3H, t, <i>J</i> = 6.9 Hz)               | 14.0 (CH <sub>3</sub> )      | 0.90 (3H, t, <i>J</i> = 6.9 Hz)                                                  | 14.5 (CH <sub>3</sub> )      | 0.90 (3H, t, <i>J</i> = 6.9 Hz)                                                  | 14.5 (CH <sub>3</sub> )      |
| 9-CH <sub>3</sub> | 1.54 (3H, s)                                  | 15.8 (CH <sub>3</sub> )      | 1.60 (3H, s)                                                                     | 16.1 (CH <sub>3</sub> )      | 1.60 (3H, s)                                                                     | 16.1 (CH <sub>3</sub> )      |
| NH                | 7.41 (1H, d, <i>J</i> = 9.0 Hz)               |                              |                                                                                  |                              |                                                                                  |                              |
| 1'                |                                               | 173.8 (C)                    |                                                                                  | 177.2 (C)                    |                                                                                  | 177.2 (C)                    |
| 2'                | 3.80 (1H, m)                                  | 71.0 (CH)                    | 3.991 (1H, m)                                                                    | 73.1 (CH)                    | 4.44 (1H, d, <i>J</i> = 7.2 Hz)                                                  | 74.1 (CH)                    |
| 3'                | 1.23 (br s)                                   | 28.7-32.2 (CH <sub>2</sub> ) | 1.29 (br s)<br>1.39 (m)<br>1.41 (m)                                              | 33.1 (CH <sub>2</sub> )      | 5.49 (1H, m)                                                                     | 129.0 (CH <sub>2</sub> )     |
| 4'                |                                               |                              |                                                                                  | 26.2 (CH <sub>2</sub> )      | 5.83 (1H, m)                                                                     | 134.5 (CH)/<br>134.74 (CH)   |
| 5'                |                                               |                              |                                                                                  | 30.2-30.9 (CH <sub>2</sub> ) | 2.04 (2H, m)                                                                     | 33.4 (CH <sub>2</sub> )      |
| 6'-15'            |                                               |                              |                                                                                  |                              | 1.29 (br s)                                                                      | 30.2-30.9 (CH <sub>2</sub> ) |
| 16'               |                                               |                              |                                                                                  | 33.1 (CH <sub>2</sub> )      | 1.39 (m)                                                                         | 33.1 (CH <sub>2</sub> )      |
| 17'               | 1.25 (overlapped)                             | 22.2 (CH <sub>2</sub> )      | 1.31 (overlapped)                                                                | 23.8 (CH <sub>2</sub> )      | 1.31 (overlapped)                                                                | 23.8 (CH <sub>2</sub> )      |
| 18'               | 0.85 (3H, t, <i>J</i> = 6.9 Hz)               | 14.0 (CH <sub>3</sub> )      | 0.90 (3H, t, <i>J</i> = 6.9 Hz)                                                  | 14.5 (CH <sub>3</sub> )      | 0.90 (3H, t, <i>J</i> = 6.9 Hz)                                                  | 14.5 (CH <sub>3</sub> )      |
| 1''               | 4.11 (1H, d, <i>J</i> = 7.8 Hz)               | 103.6 (CH)                   | 4.270 (1H, d, <i>J</i> = 8.0 Hz)                                                 | 104.7 (CH)                   | 4.273 (1H, d, <i>J</i> = 7.8 Hz)                                                 | 104.7 (CH)                   |
| 2''               | 2.94 (1H, m)                                  | 73.4 (CH)                    | 3.19 (1H, dd, <i>J</i> = 9.3, 8.0 Hz)                                            | 75.0 (CH)                    | 3.20 (1H, dd, <i>J</i> = 9.3, 7.8 Hz)                                            | 75.0 (CH)                    |
| 3''               | 3.08 (1H, m)                                  | 76.9 (CH)                    | 3.35 (1H, m)                                                                     | 77.9 (CH)                    | 3.35 (1H, m)                                                                     | 77.9 (CH)                    |
| 4''               | 3.03 (1H, m)                                  | 70.0 (CH)                    | 3.28 (1H, m)                                                                     | 71.6 (CH)                    | 3.28 (1H, m)                                                                     | 71.6 (CH)                    |
| 5''               | 3.12 (1H, m)                                  | 76.6 (CH)                    | 3.27 (1H, m)                                                                     | 78.0 (CH)                    | 3.27 (1H, m)                                                                     | 78.0 (CH)                    |
| 6''               | 3.66 (1H, m)<br>3.42 (1H, m)                  | 61.1 (CH <sub>2</sub> )      | 3.87 (1H, dd, <i>J</i> = 11.7, 1.8 Hz)<br>3.67 (1H, dd, <i>J</i> = 11.7, 4.8 Hz) | 62.7 (CH <sub>2</sub> )      | 3.87 (1H, dd, <i>J</i> = 11.7, 1.8 Hz)<br>3.67 (1H, dd, <i>J</i> = 11.7, 4.8 Hz) | 62.7 (CH <sub>2</sub> )      |
| 3-OH              | 4.93 (1H, d, <i>J</i> = 5.4 Hz)               |                              |                                                                                  |                              |                                                                                  |                              |
| 2'-OH             | 4.95 (1H, d, <i>J</i> = 4.2 Hz)               |                              |                                                                                  |                              |                                                                                  |                              |
| 2''-OH            | 4.96 (1H, d, <i>J</i> = 5.4 Hz)               |                              |                                                                                  |                              |                                                                                  |                              |
| 3''-OH            | 4.99 (1H, d, <i>J</i> = 4.2 Hz)               |                              |                                                                                  |                              |                                                                                  |                              |
| 4''-OH            | 5.00 (1H, d, <i>J</i> = 4.2 Hz)               |                              |                                                                                  |                              |                                                                                  |                              |
| 6''-OH            | 4.54 (1H, t, <i>J</i> = 5.7 Hz)               |                              |                                                                                  |                              |                                                                                  |                              |



Physical and spectral data of 5-hydroxy-2,3-dimethyl-7-methoxychromone (8)<sup>8</sup>

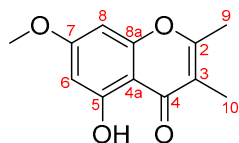

5-hydroxy-2,3-dimethyl-  
7-methoxychromone (8)

0.8 mg

Colorless solid

UV  $\lambda_{\text{max}}$  243, 290 nm; lit. UV  $\lambda_{\text{max}}$  204, 245, 255sh, 289, 314 nm

HR-MALDI-MS  $m/z$  221.0809  $[M+H]^+$ , calcd for  $C_{12}H_{13}O_4$ , 221.0808

**Table S7.**  $^1\text{H}$  NMR (600 MHz) and  $^{13}\text{C}$  NMR (150 MHz) data for 5-hydroxy-2,3-dimethyl-7-methoxychromone (8) in  $\text{CDCl}_3$

| position           | $\delta_{\text{H}}$ (Multiplicity) | $\delta_{\text{C}}$ (Type) |
|--------------------|------------------------------------|----------------------------|
| 2                  |                                    | 162.6 (C)                  |
| 3                  |                                    | 115.3 (C)                  |
| 4                  |                                    | 182.1 (C)                  |
| 4a                 |                                    | 104.8 (C)                  |
| 5                  |                                    | 162.2 (C)                  |
| 6                  | 6.31 (1H, s)                       | 97.8 (CH)                  |
| 7                  |                                    | 165.2 (C)                  |
| 8                  | 6.31 (1H, s)                       | 91.9 (CH)                  |
| 8a                 |                                    | 157.7 (C)                  |
| 9                  | 2.38 (3H, s)                       | 18.6 ( $\text{CH}_3$ )     |
| 10                 | 2.00 (3H, s)                       | 9.3 ( $\text{CH}_3$ )      |
| 5-OH               | 12.94 (1H, s)                      |                            |
| 7-OCH <sub>3</sub> | 3.84 (3H, s)                       | 55.8 ( $\text{CH}_3$ )     |

<sup>8</sup> Takenaka, Y.; Tanahashi, T.; Nagakura, N. 2, 3-Dialkylchromones from mycobiont cultures of the lichen *Graphis scripta*. *Heterocycles* **2000**, 53, 1589-1593.

Physical and spectral data of nafuredin A (**9**)<sup>9,10</sup>

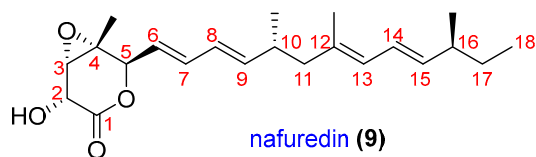

5.1 mg

White solid

$[\alpha]_D^{21} +50^\circ$  (c 0.50, CHCl<sub>3</sub>); lit.  $[\alpha]_D^{25} +49^\circ$  (c 0.10, CHCl<sub>3</sub>)<sup>10</sup>

UV  $\lambda_{\max}$  245 nm; lit. UV  $\lambda_{\max}$  253 nm<sup>9,10</sup>

HR-ESI-MS  $m/z$  361.2364 [M+H]<sup>+</sup>, calcd for C<sub>22</sub>H<sub>33</sub>O<sub>4</sub>, 361.2379

**Table S8.** <sup>1</sup>H NMR (600 MHz) and <sup>13</sup>C NMR (150 MHz) data for 5-hydroxy-2,3-dimethyl-7-methoxychromone (**8**) in CDCl<sub>3</sub><sup>9</sup>

| position           | $\delta_H$ (Multiplicity)                                              | $\delta_C$ (Type)       |
|--------------------|------------------------------------------------------------------------|-------------------------|
| 1                  |                                                                        | 170.7 (C)               |
| 2                  | 4.58 (1H, s)                                                           | 68.2 (CH)               |
| 3                  | 3.52 (1H, s)                                                           | 58.7 (CH)               |
| 4                  |                                                                        | 58.4 (C)                |
| 5                  | 4.94 (1H, d, $J$ = 8.0 Hz)                                             | 80.3 (CH)               |
| 6                  | 5.49 (1H, dd, $J$ = 15.3, 8.0 Hz)                                      | 122.1 (CH)              |
| 7                  | 6.37 (1H, dd, $J$ = 15.3, 10.5 Hz)                                     | 138.1 (CH)              |
| 8                  | 6.01 (1H, dd, $J$ = 15.5, 10.5 Hz)                                     | 126.2 (CH)              |
| 9                  | 5.80 (1H, dd, $J$ = 15.5, 7.2 Hz)                                      | 145.3 (CH)              |
| 10                 | 2.43 (1H, m)                                                           | 35.0 (CH)               |
| 11                 | 2.09 (1H, dd, $J$ = 13.5, 7.2 Hz)<br>1.98 (1H, dd, $J$ = 13.5, 7.8 Hz) | 47.3 (CH <sub>2</sub> ) |
| 12                 |                                                                        | 133.8 (C)               |
| 13                 | 5.76 (1H, d, $J$ = 11.0 Hz)                                            | 127.1 (CH)              |
| 14                 | 6.17 (1H, dd, $J$ = 15.2, 11.0 Hz)                                     | 124.7 (CH)              |
| 15                 | 5.46 (1H, dd, $J$ = 15.2, 7.8 Hz)                                      | 139.0 (CH)              |
| 16                 | 2.07 (1H, m)                                                           | 38.8 (CH)               |
| 17                 | 1.32 (2H, quint, $J$ = 7.2 Hz)                                         | 30.0 (CH <sub>2</sub> ) |
| 18                 | 0.86 (3H, t, $J$ = 7.2 Hz)                                             | 11.9 (CH <sub>3</sub> ) |
| 4-CH <sub>3</sub>  | 1.47 (3H, s)                                                           | 17.9 (CH <sub>3</sub> ) |
| 10-CH <sub>3</sub> | 0.97 (3H, d, $J$ = 6.6 Hz)                                             | 19.6 (CH <sub>3</sub> ) |
| 12-CH <sub>3</sub> | 1.70 (3H, s)                                                           | 16.6 (CH <sub>3</sub> ) |
| 16-CH <sub>3</sub> | 0.99 (3H, d, $J$ = 6.6 Hz)                                             | 20.3 (CH <sub>3</sub> ) |

<sup>9</sup> Ui, H.; Shiomi, K.; Yamaguchi, Y.; Masuma, R.; Nagamitsu, T.; Takano, D.; Sunazuka, T.; Namikoshi, M.; Omura, S. Nafuredin, a novel inhibitor of NADH-fumarate reductase, produced by *Aspergillus niger* FT-0554. *J Antibiot (Tokyo)* **2001**, *54*, 234-238.

<sup>10</sup> Damour, H.; Okoye, F.; Proksch, P.; Hakiki, A.; Mosaddak, M.; Hegazy, M.; Debbab, A. Pretrichodermamide A and nafuredin from *Trichoderma* sp, an endophyte of *Cola nitida*. *J Mater Environ Sci* **2015**, *6*, 779-783.

Physical and spectral data of harzianumols E/F (**10/11**)<sup>11</sup>

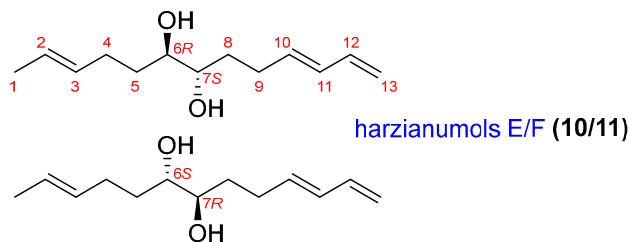

2.0 mg, mixture of enantiomers

Colorless solid

$[\alpha]_D^{19}$   $-2^\circ$  (c 0.20, CHCl<sub>3</sub>)

UV  $\lambda_{\max}$  225 nm

HR-MALDI-MS  $m/z$  233.1515 [M+Na]<sup>+</sup>, calcd for C<sub>13</sub>H<sub>22</sub>O<sub>2</sub>Na, 233.1517

**Table S9.** <sup>1</sup>H NMR (600 MHz) and <sup>13</sup>C NMR (150 MHz) data for harzianumols E/F (**10/11**) in DMSO-*d*<sub>6</sub>

| position | $\delta_H$ (Multiplicity)                                              | $\delta_C$ (Type)                               |
|----------|------------------------------------------------------------------------|-------------------------------------------------|
| 1        | 1.60 (3H, d, $J$ = 4.8 Hz)                                             | 17.9 (CH <sub>3</sub> )                         |
| 2        | 5.38 (1H, m)                                                           | 124.0 (CH)                                      |
| 3        | 5.41 (1H, m)                                                           | 131.8 (CH)                                      |
| 4        | 2.08-2.14 (1H, m)<br>1.90-1.96 (1H, m)                                 | 28.6 (CH <sub>2</sub> )/28.5 (CH <sub>2</sub> ) |
| 5        | 1.54-1.59 (1H, m)<br>1.23-1.28 (1H, m)                                 | 32.8 (CH <sub>2</sub> )                         |
| 6        | 3.14 (2H, br)                                                          | 73.23 (CH)/73.18 (CH)                           |
| 7        |                                                                        |                                                 |
| 8        | 1.59-1.64 (1H, m)<br>1.27-1.33 (1H, m)                                 | 32.4 (CH <sub>2</sub> )                         |
| 9        | 2.20-2.25 (1H, m)<br>2.01-2.08 (1H, m)                                 | 28.6 (CH <sub>2</sub> )/28.5 (CH <sub>2</sub> ) |
| 10       | 5.75 (1H, dt, $J$ = 15.1, 7.4 Hz)                                      | 135.9 (CH)                                      |
| 11       | 6.04 (1H, dd, $J$ = 15.1, 10.4 Hz)                                     | 130.6 (CH)                                      |
| 12       | 6.30 (1H, dt, $J$ = 17.0, 10.4 Hz)                                     | 137.4 (CH)                                      |
| 13       | 5.08 (1H, dd, $J$ = 17.0, 1.8 Hz)<br>4.94 (1H, dd, $J$ = 10.4, 1.2 Hz) | 114.9 (CH <sub>2</sub> )                        |
| 6-OH     | 4.34 (1H, d, $J$ = 6.0 Hz)                                             |                                                 |
| 7-OH     | 4.36 (1H, d, $J$ = 5.4 Hz)                                             |                                                 |

<sup>11</sup> Li, B.; Huang, Q.X.; Gao, D.; Liu, D.; Ji, Y.B.; Liu, H.G.; Lin, W.H. New C<sub>13</sub> lipids from the marine-derived fungus *Trichoderma harzianum*. *J Asian Nat Prod Res* **2015**, 17, 468-474.
